# Supplementary material for: Abnormal expression of Nrf2 may play an important role in the pathogenesis and development of adenomyosis
Source: PubMed Central journal article supplement (PMC5560740; doi:10.1371/journal.pone.0182773), 2017-08-17
Supplement: pone.0182773.s001.pdf [file pone.0182773.s001.pdf]

浙江大学医学院附属妇产科医院

医学伦理委员会意见书

|                                                                                                                                                                                                                                                     |             |                                                |             |                           |              |                                             |              |                   |                   |
|-----------------------------------------------------------------------------------------------------------------------------------------------------------------------------------------------------------------------------------------------------|-------------|------------------------------------------------|-------------|---------------------------|--------------|---------------------------------------------|--------------|-------------------|-------------------|
| <p>1、临床研究 2、临床基础科研 3、药物验证 4、医疗仪器试剂验证<br/>5、新技术开展</p>                                                                                                                                                                                                | <p>项目类型</p> | <p>雌激素调控的Nt2-ARE通路在子宫腺肌病腺上皮细胞侵袭迁移中的作用及机制研究</p> | <p>项目名称</p> | <p>伦理批准号<br/>20160109</p> | <p>项目负责人</p> | <p>谢臻蔚<br/>职称<br/>主任医师<br/>所在科室<br/>妇四科</p> | <p>项目参与者</p> | <p>陈宁、沈凤贤、王彩琴</p> | <p>项目实施的伦理学问题</p> |
| <p>1、对受试者可能带来的心理、生理、生活、经济及其他损害和不利影响，防范和补救对策。<br/>2、对受试者可能带来的近、远期潜在危险及其防范<br/>3、其它伦理学问题（包括受试者个人、家庭、社会、人类等方面）</p> <p>本研究项目拟收集宫颈癌 IA 期病人及子宫腺肌病人子宫切除术中的内膜组织，量约 1-2g，不影响患者的临床及病理诊断，不对患者的经济产生不利影响，对参加本课题的受试者的心理、生理、生活无明显不利影响及损害。课题研究方案对受试者近远期无明显潜在危险。</p> |             |                                                |             |                           |              |                                             |              |                   |                   |

20

|                                                                                                                |                                                                                                                                                                                             |
|----------------------------------------------------------------------------------------------------------------|---------------------------------------------------------------------------------------------------------------------------------------------------------------------------------------------|
| <p>1、知情同意书</p> <p>2、研究计划书</p> <p>3、</p> <p>4、</p> <p>5、</p> <p>6、</p> <p>7、</p> <p>8、</p> <p>9、</p> <p>10、</p> | <p>是否符合简易程序：<br/>1、是 <input checked="" type="checkbox"/> 2、否</p> <p>预审专家（签名）：<br/>李洪明</p> <p>审查结果：<br/>1、同意 <input checked="" type="checkbox"/> 2、修改后同意 3、修改后重审 4、不同意</p> <p>伦理委员会意见</p>    |
| <p>申请者签名：<br/>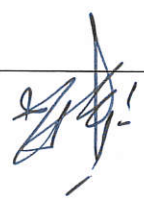</p>          | <p>伦理委员会主任（签名）：<br/></p>  |
